# Supplementary material
Source: PubMed Central journal article supplement (PMC2689980)
Supplement: pp.109.138230_1.pdf [file pp.109.138230_1.pdf]

**A**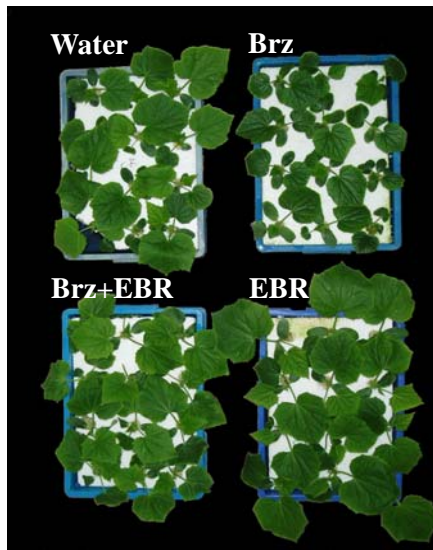**B**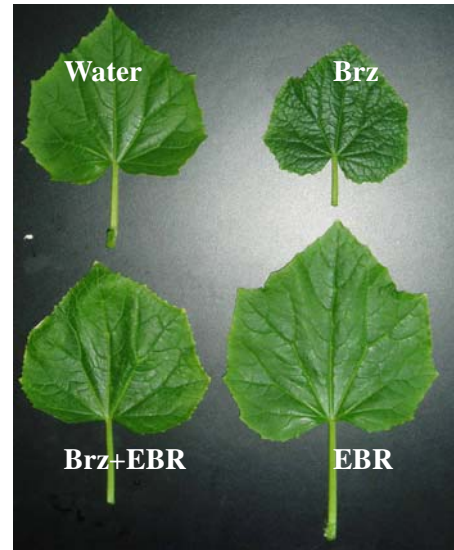

**Supplemental Figure 1** Phenotypes of four types of plants with different BR level

Cucumber seedlings were treated with 0.1  $\mu\text{M}$  24-epibrassinolide (EBR) or 4  $\mu\text{M}$  brassinazole (Brz) when the cotyledons fully expanded. EBR was applied every 5 days while Brz was applied every two days. To test whether Brz cause any non-specific effects, the seedlings were co-applied with Brz and EBR (Brz+EBR) to see whether the phenotype could be restored.

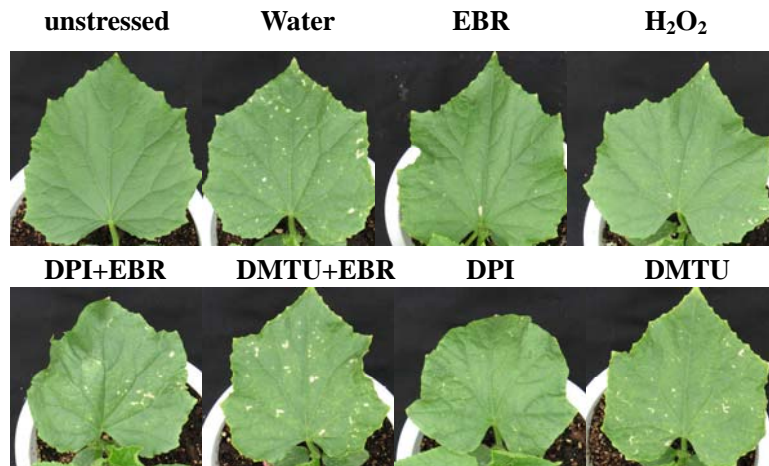

**Supplemental Figure 2.** Oxidative symptoms of the PQ-challenged leaves after different treatments. Plants were pretreated with 100  $\mu$ M DPI or 5 mM DMTU for 8 h and then plants were treated with 0.1  $\mu$ M EBR or 10 mM H<sub>2</sub>O<sub>2</sub>. After one day plants were challenged with 10  $\mu$ M PQ. Single treatment of DPI or DMTU was included as negative control.

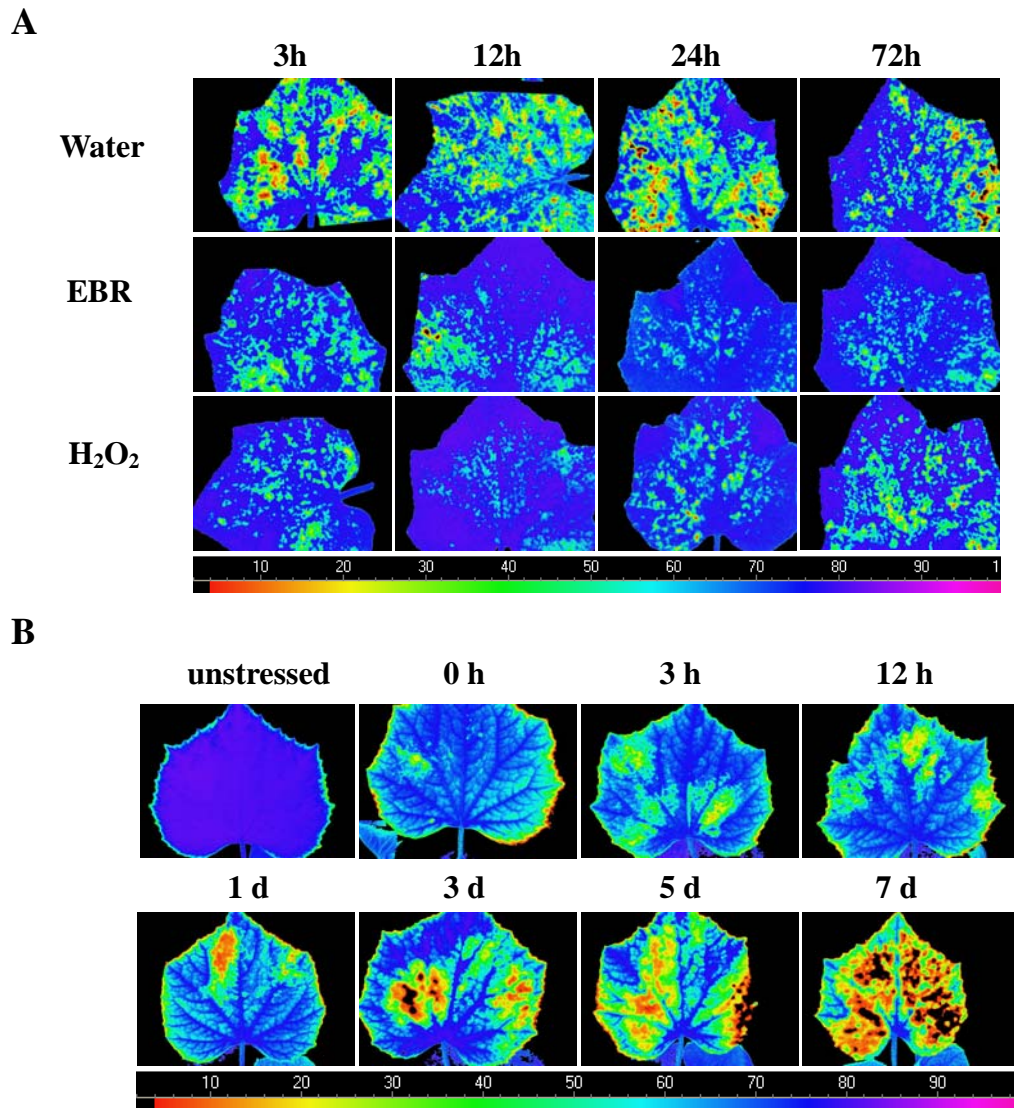

**Supplemental Figure 3.** Images of the maximum PSII quantum yield (Fv/Fm) of PQ-challenged leaves after different time of EBR treatment (A) and different duration of Brz treatment (B).

(A) PQ (10  $\mu\text{M}$ ) was applied at 3, 6, 12, 24 or 72 h after water, 0.1  $\mu\text{M}$  EBR or 10 mM H<sub>2</sub>O<sub>2</sub> treatment. Time zero points indicate PQ treatment only. Fv/Fm was determined after one day at 600  $\mu\text{mol m}^{-2} \text{s}^{-1}$  and 25°C.

(B) Brz (4  $\mu\text{M}$ ) treatment started at 7 d, 5 d, 3 d, 1 d, 12 h or 3 h before 10  $\mu\text{M}$  PQ challenge. Brz treatment was repeated on alternative days until PQ challenge. Time zero points indicate PQ treatment only. Fv/Fm was determined after one day at 600  $\mu\text{mol m}^{-2} \text{s}^{-1}$  and 25°C.

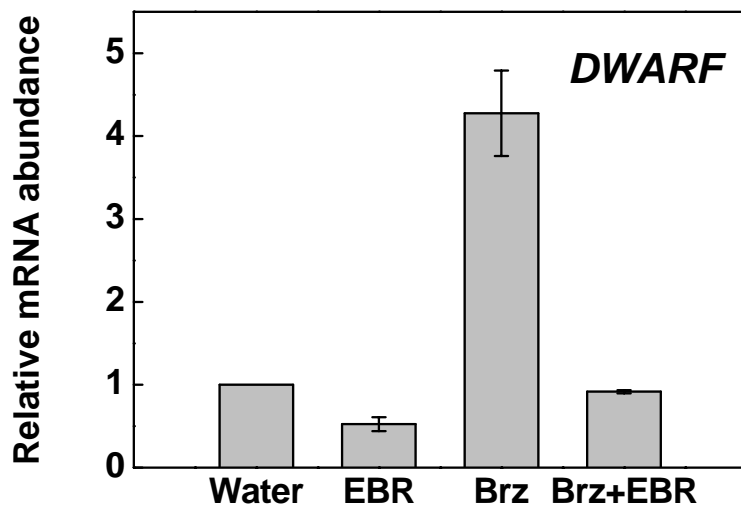

**Supplemental Figure 4.** *DWARF* gene expression in four types of plants with different BR level. The steady-state mRNA levels of *DWARF*, which encodes a BR-6-oxidase, were determined in plant treated with water, EBR, Brz or Brz+EBR

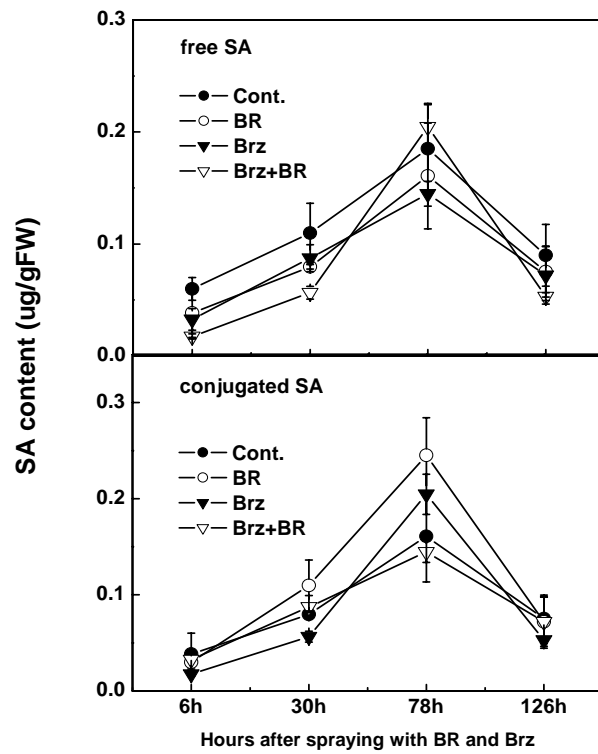

**Supplemental Figure 5.** SA accumulation after EBR, Brz or Brz+EBR treatment

**Table I.** Primers used for real time RT-PCR assays

| Gene          | Primer pairs                                      |
|---------------|---------------------------------------------------|
| <i>RBOH</i>   | F: AAGGTTGCTGTTTATCC<br>R: AATGGTCTTGAGTTGGG      |
| <i>MAPK1</i>  | F: ATTGATGTGTGGTCTGTAGG<br>R:GGAGAGTATGGAAGGGATTT |
| <i>MAPK3</i>  | F: GGAACAGATACGAAGGGGT<br>R:TTCAGCAGCAGAAGGACGG   |
| <i>WRKY30</i> | F: CATCTTCACCCTTCTTCAT<br>R:CGCATCTCTGCTTCTACTG   |
| <i>WRKY6</i>  | F: GAGGAGTTGATAGTGGTGG<br>R:TTCTTGCTCTGATTTGGTT   |
| <i>MYB</i>    | F: AGTGTTAGGCGTGGGAATA<br>R:AGAGGTGGGTGTGGTGGTT   |
| <i>MYC</i>    | F: CGAAAAAGAGGGCGAAAG<br>R:AGATAGCATCACCAAGGA     |
| <i>HSP70</i>  | F: GTTATTGGGATAGATTTG<br>R:GAAGGTGTGATACGGTTT     |
| <i>Dnaj</i>   | F: CAAGGAAGGAATGGGAGGT<br>R:TGCTGAATCATAGAGGGGC   |
| <i>PR-1</i>   | F: AACTCTGGCGGACCTTAC<br>R:GACTTCCTCCACACTACT     |
| <i>PAL</i>    | F: ACGGTTTGCCTTCTAAT<br>R:CATCCTGGTTGTGTTGC       |
| <i>HPL</i>    | F: CTCCTTTCTCGCTTCTCACC<br>R:TCAAACGACACGGCATCACT |
| <i>GST</i>    | F: TTTGAGGAGGTGAAGGTAA<br>R:ACGCACAAGAAATGTAGAT   |

|              |                                                     |
|--------------|-----------------------------------------------------|
| <i>GPX</i>   | F: GTCAAGGATGCTAAAGG<br>R: TTGTCAAAAATGGGGTA        |
| <i>POD</i>   | F: AGTGCTTGTCCAGGAGTTGA<br>R:AGGGATGAAGTGGGATAAAG   |
| <i>CAT</i>   | F: ATGCTGGAAGAGGAGGCTAT<br>R:ATGGTGAGGACATTTGGGAG   |
| <i>cAPX</i>  | F: ATGGGAAAGTGCTACCCTGTT<br>R:ACAATGTCCTGGTCCGAAAG  |
| <i>MDAR</i>  | F: CTCCTTATGAGCGTCCAG<br>R:GTGAAGCCTACAGCGACT       |
| <i>Dwarf</i> | F: ATGAGAGGTGCTCTGCTTGC<br>R: TAGATGAGCGGAGAGCCATC  |
| <i>actin</i> | F: TGGACTCTGGTGATGGTGTTA<br>R:CAATGAGGGATGGCTGGAAAA |

---

F indicates forward and R indicates reverse.
